# Supplementary material for: Efficient bipolar AIE emitters for high-performance nondoped OLEDs
Source: Royal Society of Chemistry journal article supplement (doi:10.1039/d0tc02566f), 2020-01-01
Supplement: d0tc02566f1.pdf [file d0tc02566f1.pdf]

## Supporting Information

### Efficient Bipolar AIE Emitter for High-Performance Nondoped OLED

Jiasen Zhang,<sup>a,b,†</sup> Yongqi Bai,<sup>a,†</sup> Qiang Wei,<sup>a\*</sup> Liang Cao,<sup>a,b</sup> Tao Wang,<sup>b\*</sup> and Ziyi Ge<sup>a,c\*</sup>

<sup>a</sup> Ningbo Institute of Materials Technology and Engineering, Chinese Academy of Sciences, Ningbo 315201, PR China

<sup>b</sup> College of material science and engineering, Zhejiang Sci-Tech University, Hangzhou, 310018, PR China

<sup>c</sup> Center of Materials Science and Optoelectronics Engineering, University of Chinese Academy of Sciences, PR China

\*E-mail: weiqiang@nimte.ac.cn; taotao571@hotmail.com; geziyi@nimte.ac.cn

†These two author contributed equally.

#### 1. Materials and Instrumentations

All chemicals applied into reaction were received without further purification. Only titanium(IV) chloride was purchased from Alfa Aesar, while all the other chemicals, including 9-phenyl-9*H*-carbazol-3-ylboronic acid (CAS No. : 854952-58-2), (4-(1-Phenyl-1*H*-benzo[*d*]imidazol-2-yl) phenyl) boronic acid (CAS No.: 952514-79-3), tetrakis(triphenylphosphine)palladium (Pd(PPh<sub>3</sub>)<sub>4</sub>), 4-bromobenzophenone, potassium carbonate, and benzophenone were supplied by Energy-Chemicals.

<sup>1</sup>H (400MHz) and <sup>13</sup>C (100MHz) NMR (nuclear magnetic resonance) spectra were recorded through a Bruker DMX-400 Spectrometer (400MHz) using CDCl<sub>3</sub> as solvent and TMS as internal reference. The thermogravimetric analysis (TGA) was performed on a Perkin-Elmer Pyris Diamond TG/DTA thermal analysis instrument from 30 °C to 650 °C at a scanning rate of 10 °C min<sup>-1</sup> under nitrogen. Differential scanning calorimetry (DSC) was performed on a Perkin-Elmer Pyris Diamond Differential Scanning Calorimeter at a heating rate of 10 °C min<sup>-1</sup> from 30 °C to 300 °C under a nitrogen atmosphere. The UV-vis absorption spectra were measured by a Perkin-Elmer

Lambda 950 spectrophotometer. Photoluminescent (PL) spectra were measured on a Fluoromax-4 fluorescence spectrophotometer. Photoluminescent quantum yields were measured using a Hamamatsu absolute PL quantum yield spectrometer C11347 Quantaaurus\_QY with doped films spinning coated on quartz glass. The DFT calculations were performed with the Gaussian09 series of programs using the B3LYP hybrid functional and 6-31G (d, p) basis set. Electrochemical cyclic voltammetry (CV) was performed on a CHI 660D electrochemical workstation to measure the HOMO level in anhydrous acetonitrile with 0.1 M tetrabutylammonium hexafluorophosphate (TBAPF<sub>6</sub>) in acetonitrile at a scan rate of 100 mv S<sup>-1</sup>, using Ag/AgCl and platinum wire as reference and counter electrode, respectively. A platinum electrode coated with thin molecule film was used as the working electrode.

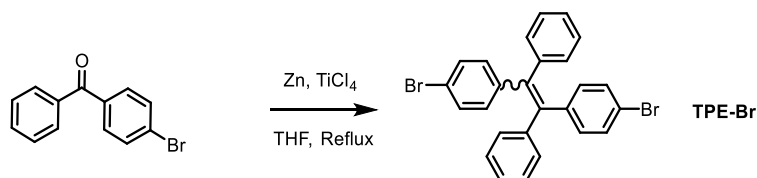

**Scheme S1.** Synthesis route to AIE precursor **TPE-Br**.

1,2-bis(4-bromophenyl)-1,2-diphenylethene (**TPE-Br**) : TiCl<sub>4</sub> (3.3 mL, 30.0 mmol) was firstly added dropwisely into the mixture of Zn (3.90 g, 60.0 mmol), 4-bromobenzophenone (0.85 mg, 2.5 mmol) and 40 mL dry THF under nitrogen atmosphere at 0 °C. The mixture was stirred for 30 min at room temperature and then refluxed overnight. After that, the mixture was filtrated, extracted with CH<sub>2</sub>Cl<sub>2</sub> and finally purified by silica gel chromatography with chloroform and petroleum as eluent to afford a bright yellow solid (1.12 g, 76.2%). <sup>1</sup>H NMR (400 MHz, CDCl<sub>3</sub>), δ (TMS, ppm): 6.87, 6.99, 7.10, 7.20. <sup>13</sup>C NMR (100 MHz, CDCl<sub>3</sub>), δ (TMS, ppm): 120.6, 126.9, 127.7, 128.0, 130.8, 131.2, 132.8, 140.2, 142.3, 142.7. ESI-TOF-MS (C<sub>26</sub>H<sub>18</sub>Br<sub>2</sub>): m/z 487.9794 (M<sup>+</sup> calculated 487.9775).

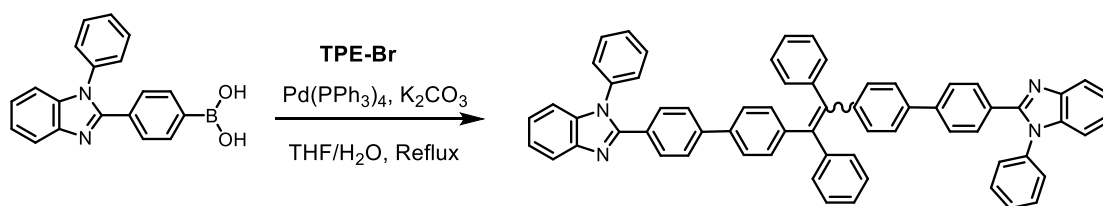

**Scheme S2.** Synthesis route to **TPE-3**.

1,2-diphenyl-1,2-bis(4'-(1-phenyl-1H-benzo[d]imidazol-2-yl)-[1,1'-biphenyl]-4-yl) ethene (**TPE-3**): 4-(1-phenyl-1H-benzo[d]imidazol-2-yl)phenylboronic acid (2.21g, 7.03mmol), 1,2-bis(4-bromophenyl)-1,2-diphenylethene (1.64g, 3.45mmol),  $K_2CO_3$  (9.26g, 70.00mmol), Tetrakis(triphenylphosphine)palladium (486mg, 0.42mmol), THF:H<sub>2</sub>O (240mL, 3:1, v/v) were added into a 500 mL 3 neck round bottom flask under nitrogen. The mixture was stirred at 150 °C for 16 hours and then poured into 300mL water, extraction with dichloromethane(DCM), The crude product was purified by column chromatography on silica gel (petroleum ether : dichloromethane = 2:1, v/v) to get 1.20 g of yellow powder in yield of 40 %. <sup>1</sup>H NMR (400 MHz, Chloroform-d)  $\delta$  7.87 (d, J = 8.0 Hz, 2H), 7.58 (d, J = 8.3 Hz, 4H), 7.48 (d, J = 8.0 Hz, 10H), 7.31 (d, J = 6.4 Hz, 10H), 7.24 (s, 4H), 7.12 – 6.99 (m, 14H). <sup>13</sup>C NMR (101 MHz, Chloroform-d)  $\delta$  143.34, 143.04, 140.74, 137.34, 137.08, 131.92, 131.43, 129.95, 129.79, 128.65, 128.63, 127.89, 127.75, 127.49, 126.71, 126.62, 126.29, 126.16, 123.40, 123.07, 119.82, 110.46.

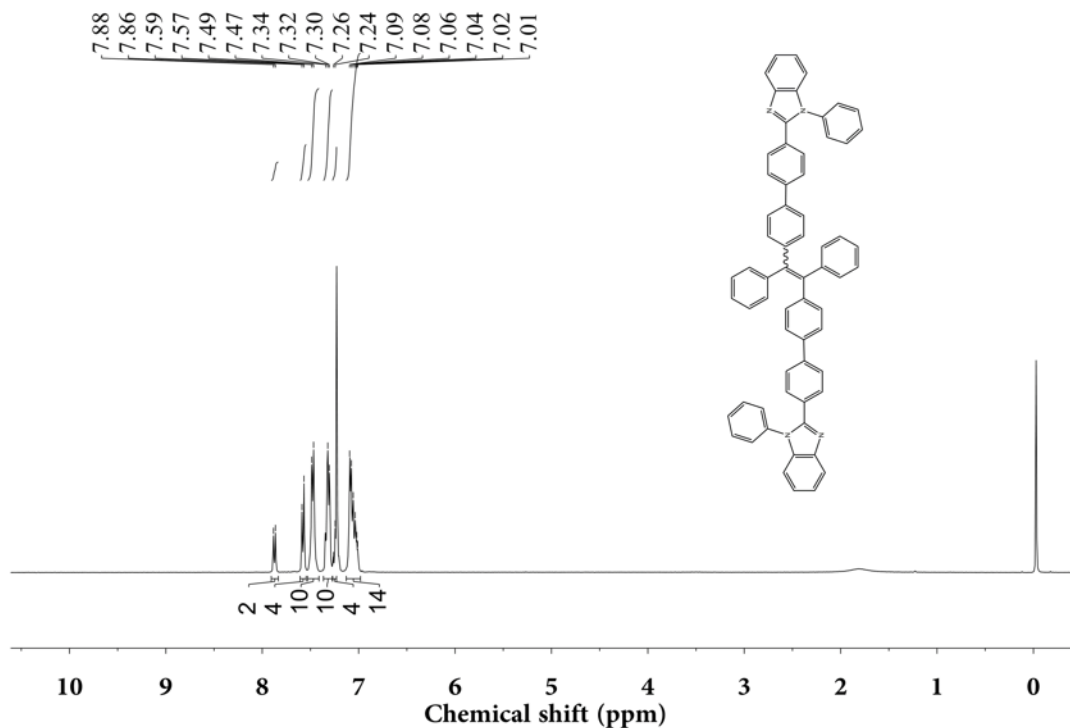

The  $^1\text{H NMR}$  spectrum of **TPE-3**

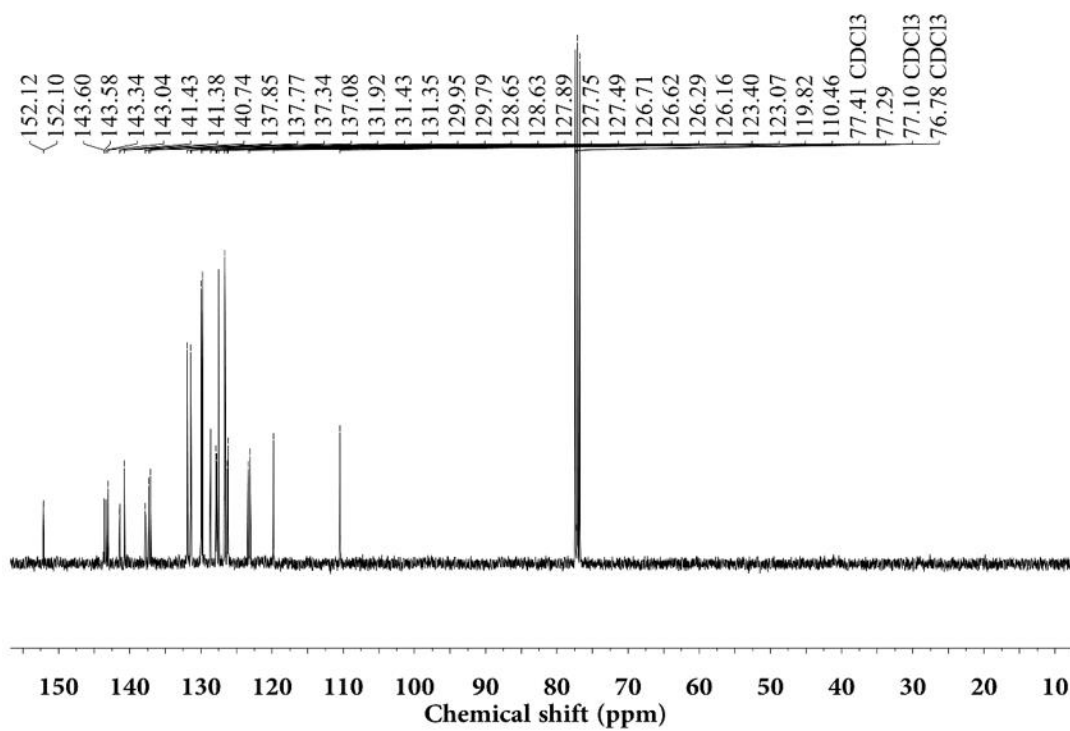

The  $^{13}\text{C NMR}$  spectrum of **TPE-3**

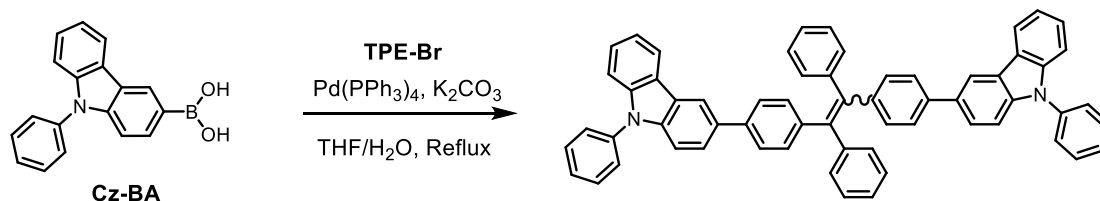

**Scheme S3.** Synthesis route to **TPE-1**

1,2-diphenyl-1,2-bis(4-(9-phenyl-9H-carbazol-3-yl)phenyl)ethene (**TPE-1**): The synthesis of **TPE-1** was similar to that of **TPE-3**. It was obtained as a yellow powder in yield of 54 %. <sup>1</sup>H NMR (400 MHz, Chloroform-d) δ 8.31 (d, J = 6.3 Hz, 2H), 8.14 (t, J = 7.8 Hz, 2H), 7.65 – 7.51 (m, 11H), 7.51 – 7.42 (m, 5H), 7.42 – 7.36 (m, 6H), 7.30 – 7.24 (m, 2H), 7.21 – 7.10 (m, 14H). <sup>13</sup>C NMR (101 MHz, Chloroform-d) δ 141.31, 140.65, 140.32, 137.68, 132.94, 131.90, 131.54, 129.89, 129.87, 127.83, 127.67, 127.46, 127.44, 127.04, 126.49, 126.44, 126.41, 126.30, 126.06, 126.04, 125.26, 123.85, 123.52, 120.36, 120.04, 118.57, 118.54, 109.92, 109.89, 109.86.

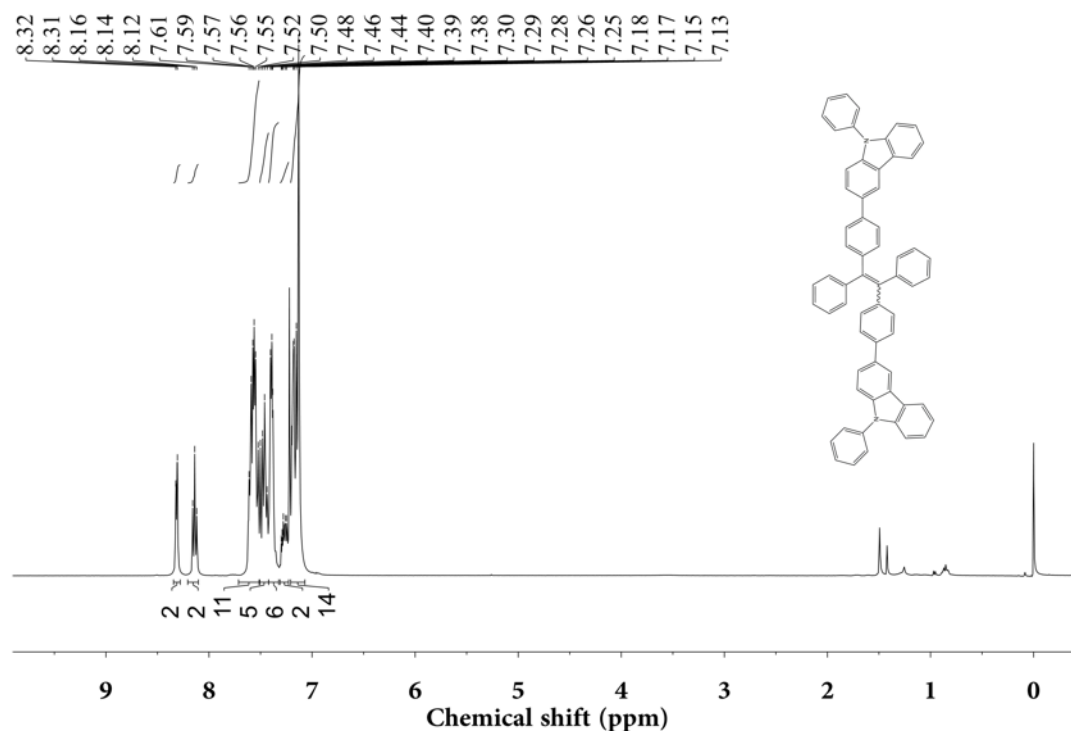

The <sup>1</sup>H NMR spectrum of **TPE-1**

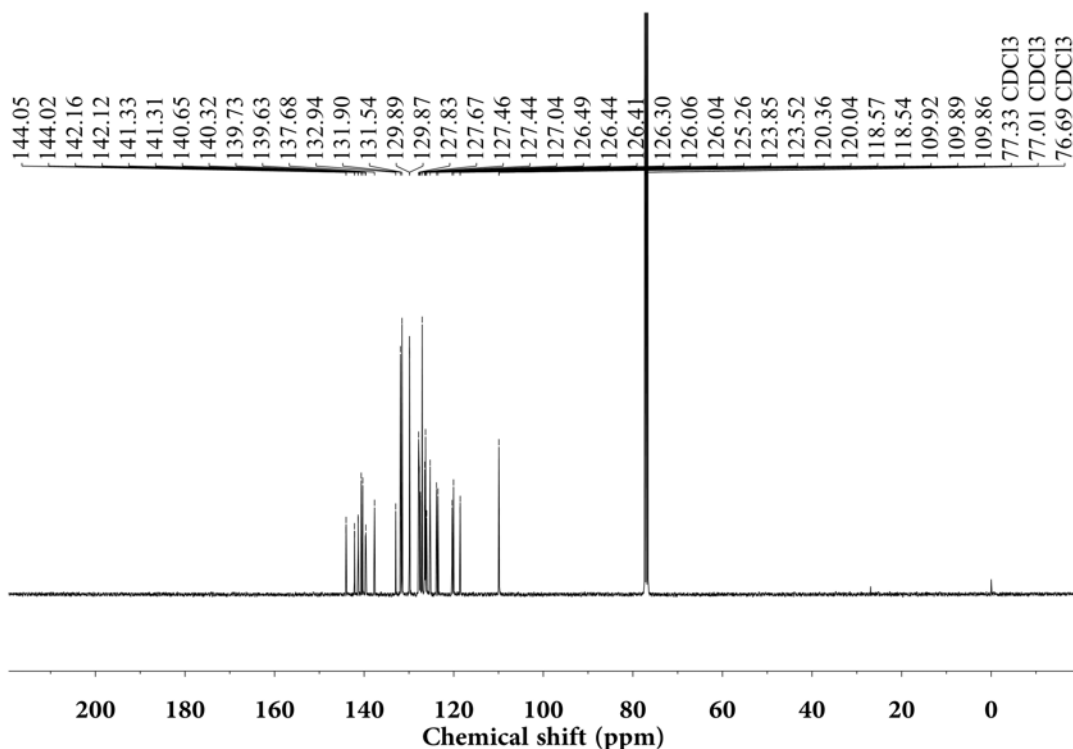

The  $^{13}\text{C}$  NMR spectrum of **TPE-1**

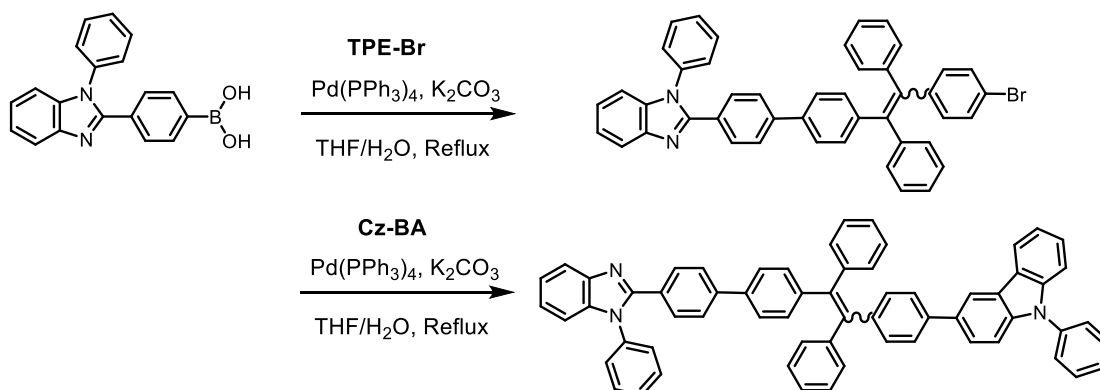

**Scheme S4.** Synthesis route to **TPE-2**

3-(4-(1,2-diphenyl-2-(4'-(1-phenyl-1H-benzo[d]imidazol-2-yl)-[1,1'-biphenyl]-4-yl) vinyl) phenyl)-9-phenyl-9H-carbazole (**TPE-2**): The synthesis **TPE-2** was also similar to that of **TPE-3**. It was obtained as a yellow powder in yield of 33 %.  $^1\text{H}$  NMR (400 MHz, Chloroform-d)  $\delta$  8.34 – 8.28 (m, 1H), 8.14 (d,  $J = 8.5$  Hz, 1H), 7.95 – 7.85 (m, 1H), 7.63 – 7.53 (m, 7H), 7.52 – 7.42 (m, 8H), 7.40 (dd,  $J = 6.3, 2.3$  Hz, 3H), 7.37 – 7.25 (m, 6H), 7.24 (s, 1H), 7.21 (s, 1H), 7.18 – 7.04 (m, 14H).  $^{13}\text{C}$  NMR (101 MHz, Chloroform-d)  $\delta$  152.10, 143.85, 142.89, 141.94, 141.34, 141.11, 140.33, 137.67, 131.99, 131.89, 131.51, 129.97, 129.94, 129.81, 128.66, 128.47, 127.91, 127.87,

127.74, 127.51, 127.48, 127.06, 126.64, 126.55, 126.46, 126.35, 126.31, 126.14, 125.28, 123.88, 123.52, 123.43, 123.13, 120.39, 120.10, 119.78, 118.58, 110.47, 109.95, 77.29.

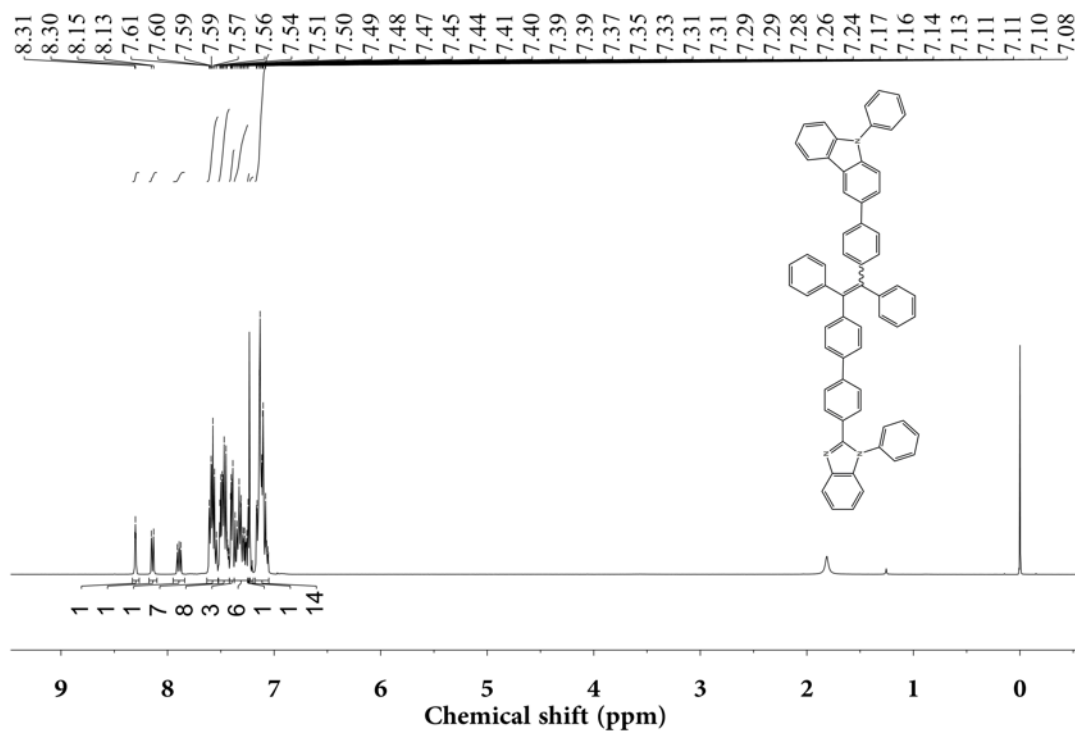

The  $^1\text{H}$  NMR spectrum of **TPE-2**

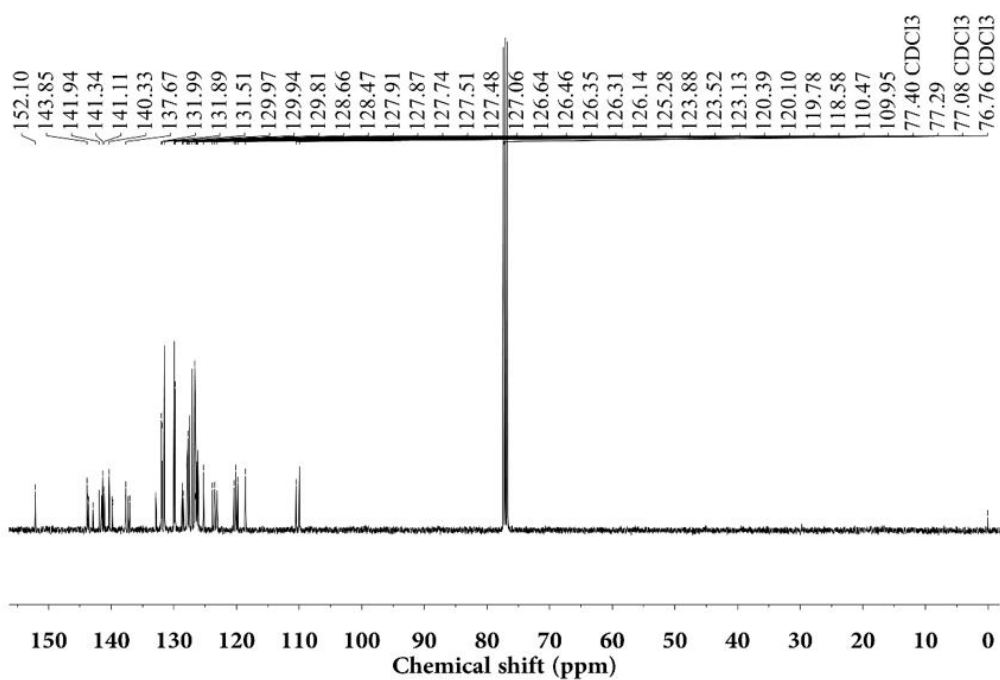

The  $^{13}\text{C}$  NMR spectrum of **TPE-2**

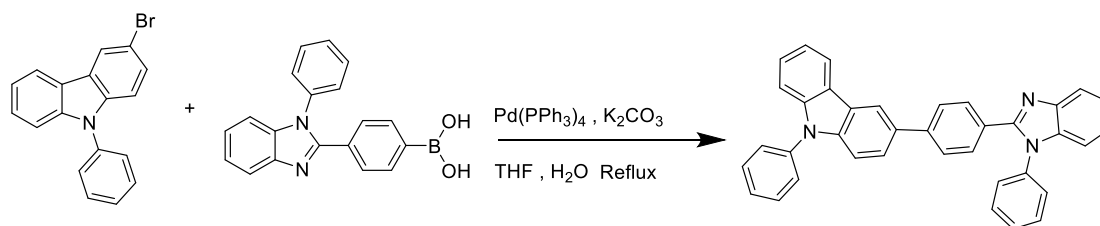

**Scheme S5.** Synthesis route to **Cz-PBi**

9-phenyl-3-(4-(1-phenyl-1H-benzo[d]imidazol-2-yl)phenyl)-9H-carbazole (**Cz-PBi**):  
 The synthesis of 9-phenyl-3-(4-(1-phenyl-1H-benzo[d]imidazol-2-yl)phenyl)-9H-carbazole (**Cz-PBi**) was similar to that of **TPE-3**. It was obtained as a white powder in yield of 39 %.  $^1\text{H}$  NMR (400 MHz, Chloride- $d_2$ )  $\delta$  8.34 – 8.28 (m, 1H), 8.14 (d,  $J = 8.5$  Hz, 1H), 7.95 – 7.85 (m, 1H), 7.63 – 7.53 (m, 7H), 7.52 – 7.42 (m, 8H), 7.40 (dd,  $J = 6.3, 2.3$  Hz, 3H), 7.37 – 7.25 (m, 6H), 7.24 (s, 1H), 7.21 (s, 1H), 7.18 – 7.04 (m, 14H).  $^{13}\text{C}$  NMR (101 MHz, Methylene Chloride- $d_2$ )  $\delta$  143.19, 141.40, 140.65, 137.56, 137.23, 132.05, 129.93, 129.92, 129.85, 128.59, 128.24, 127.59, 127.56, 126.96, 126.73, 126.25, 125.17, 123.89, 123.33, 123.12, 122.76, 120.29, 120.15, 119.50, 118.60, 110.39, 110.14, 109.94.

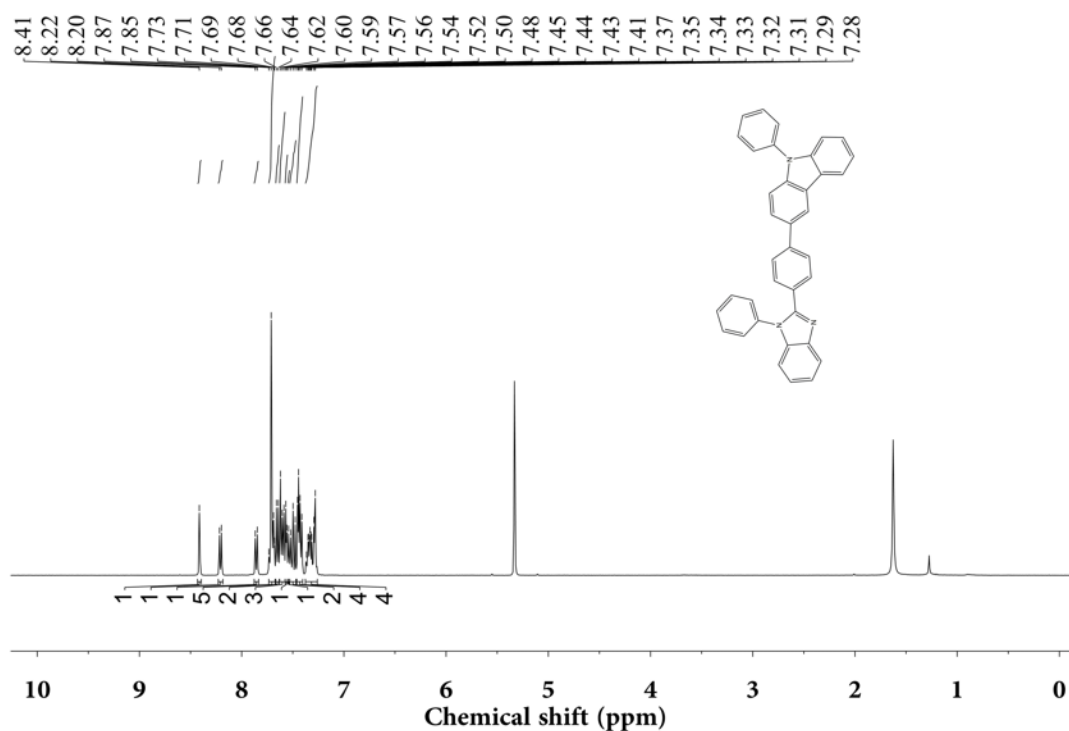

The  $^1\text{H}$  NMR spectrum of **Cz-PBi**



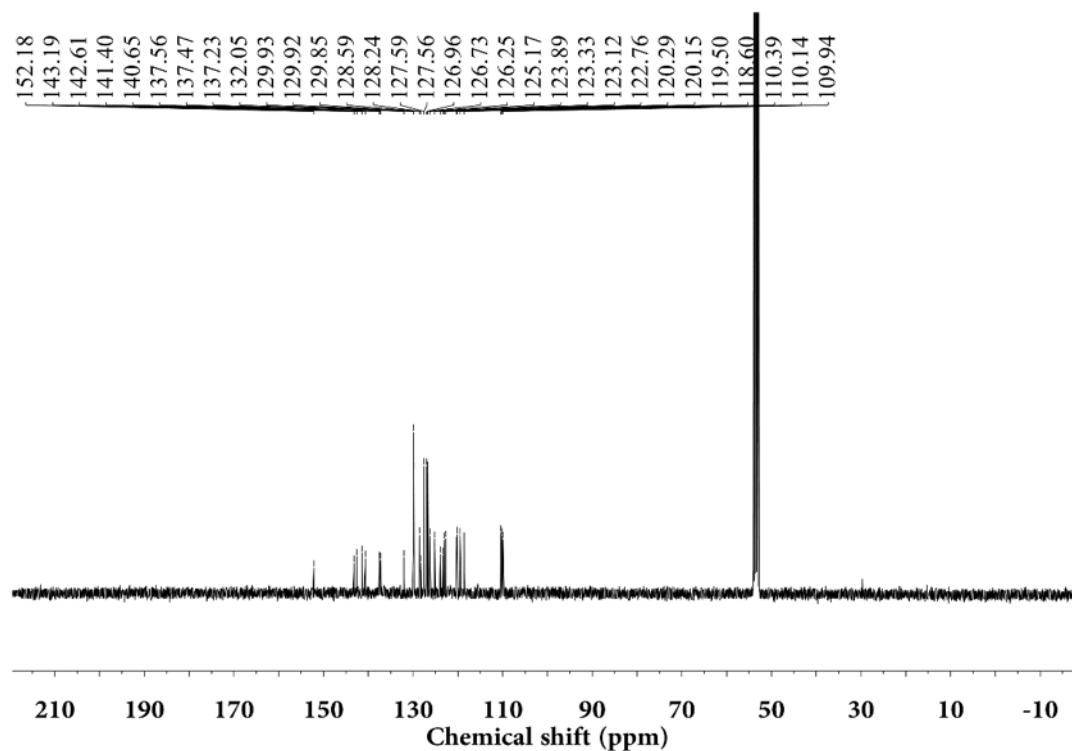

The  $^{13}\text{C}$  NMR spectrum of **Cz-PBi**

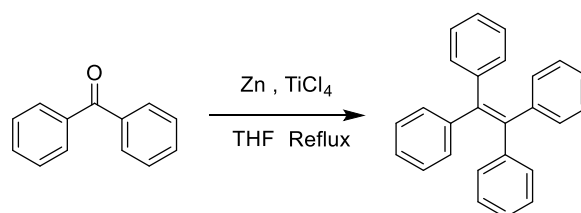

**Scheme S6.** Synthesis route to **TPE**

Tetraphenylethene (**TPE**): The TPE was synthesized through McMurry reactions, according to previous research.<sup>1</sup>

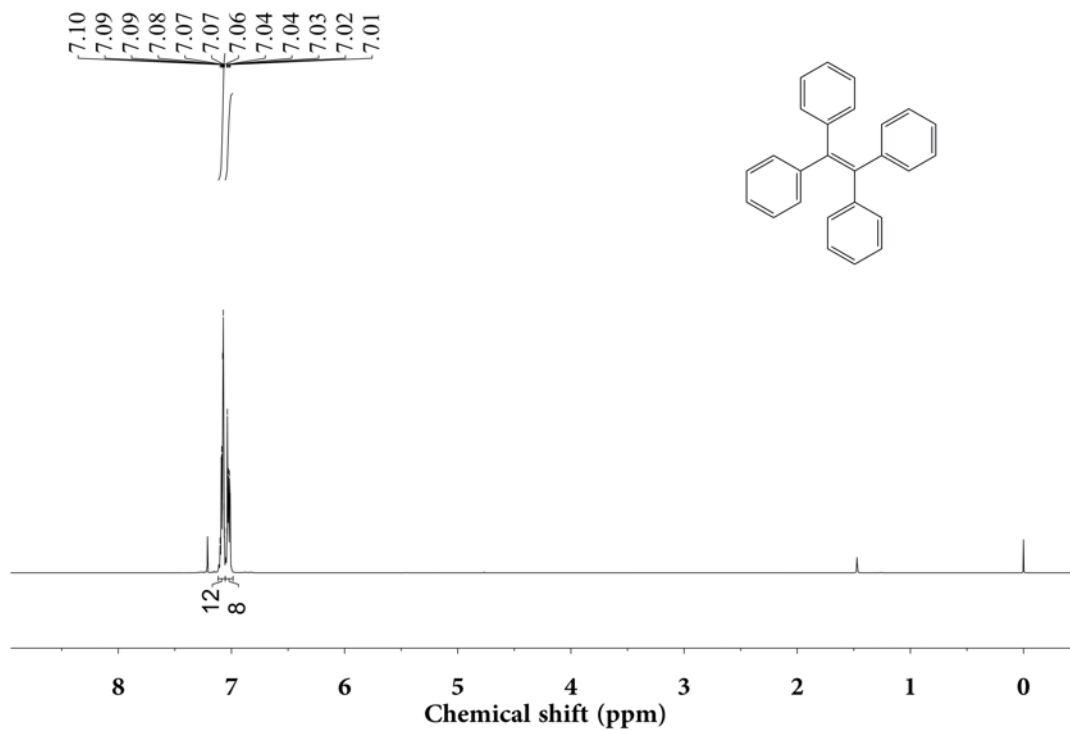

The  $^1\text{H}$  NMR spectrum of **TPE**

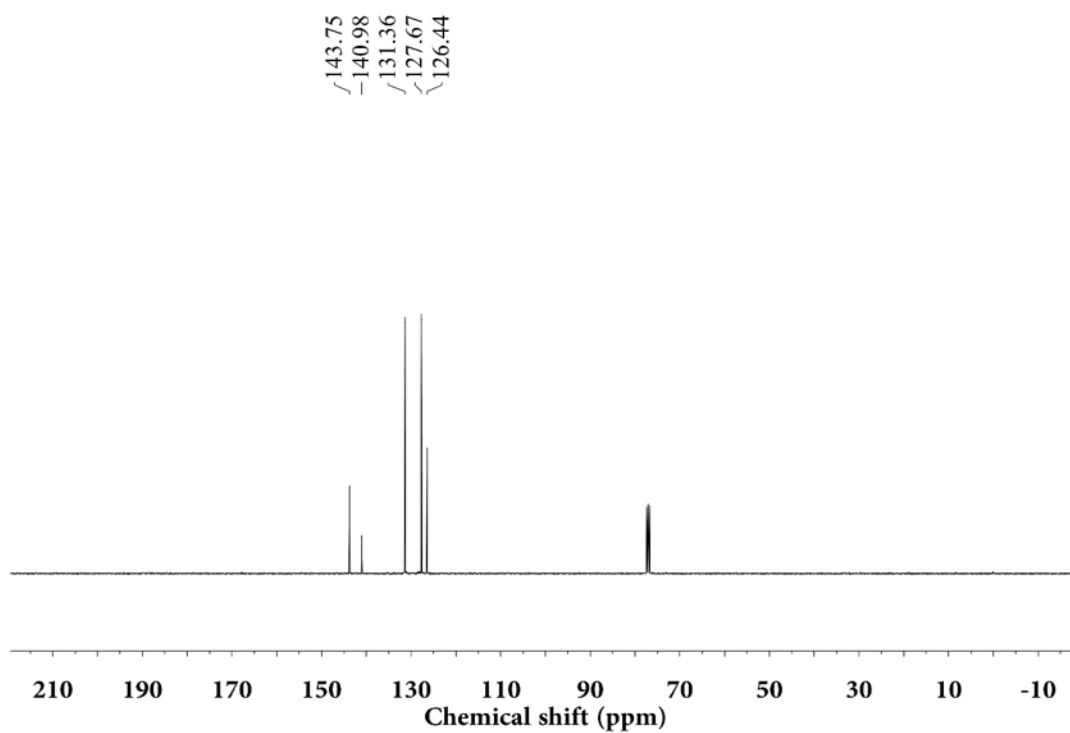

The  $^{13}\text{C}$  NMR spectrum of **TPE**

## 2. Thermal Analysis of AIEgens

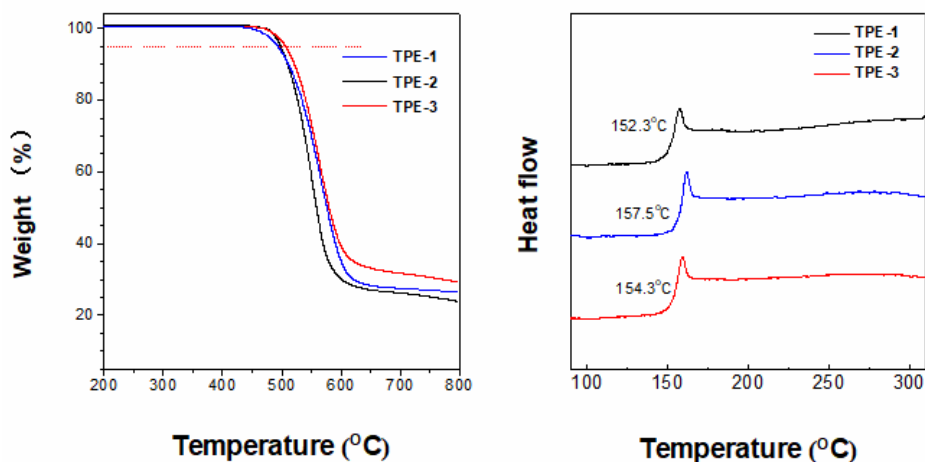

**Figure S1.** Thermogravimetric analysis (TGA) and differential scanning calorimeter (DSC) curves **TPE-n** ( $n=1-3$ ).

## 3. Optical Properties of AIEgens

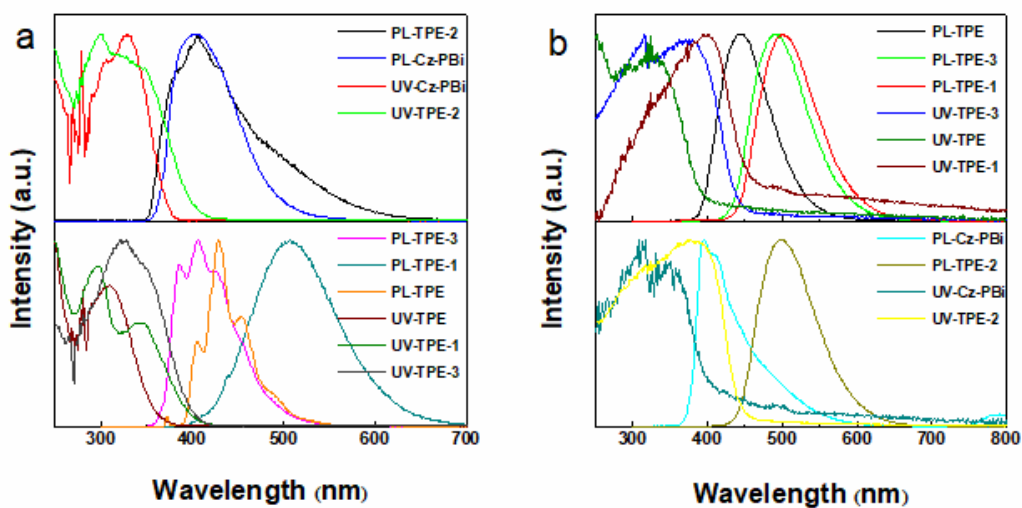

**Figure S2.** The photoluminescence in THF (a) and film (b), based on **Cz-PBi**, **TPE** and its derivatives **TPE-n** ( $n=1-3$ ).

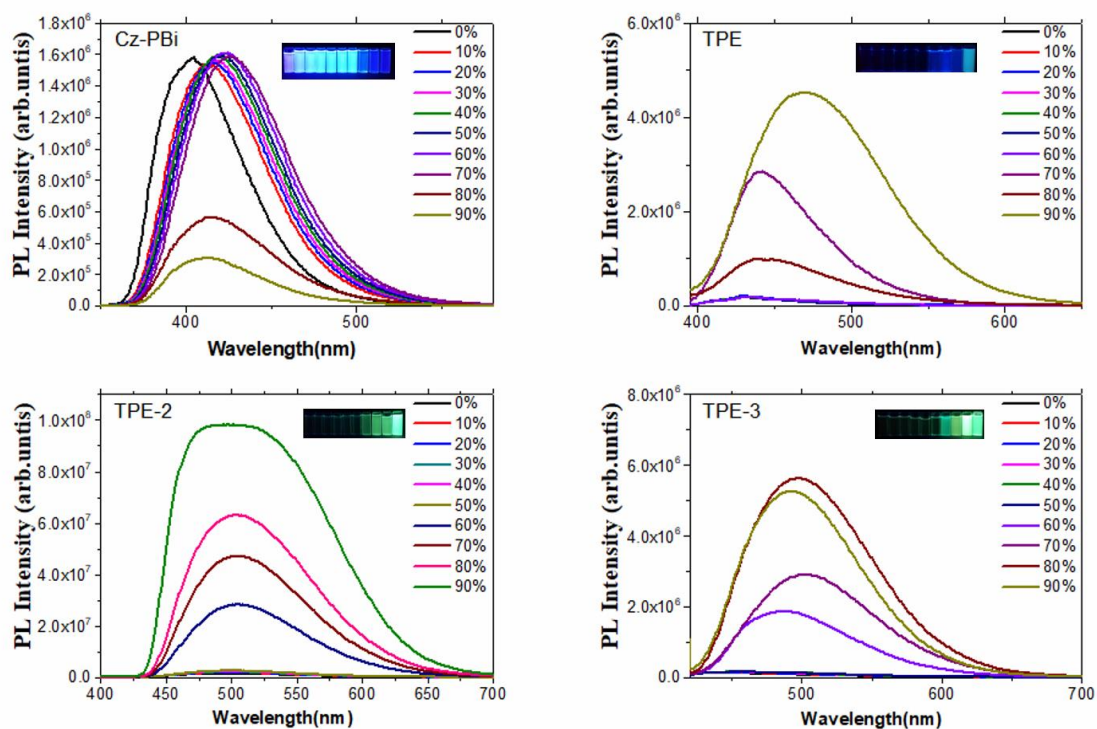

**Figure S3.** PL spectra in THF/water mixture with different water fraction (fw%) of Cz-PBi, TPE, TPE-2 and TPE-3.

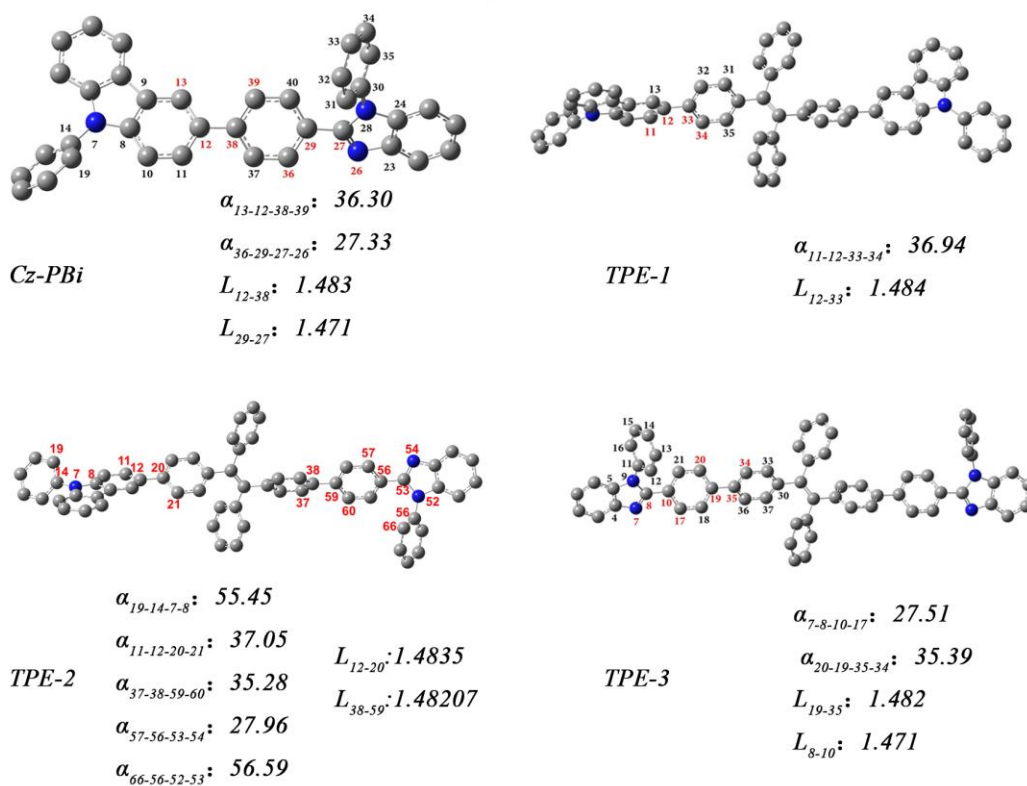

**Figure S4.** Optimized structures of Cz-PBi, TPE and TPE-n (n=1-3).

#### 4. Electrochemical Properties of AIEgens

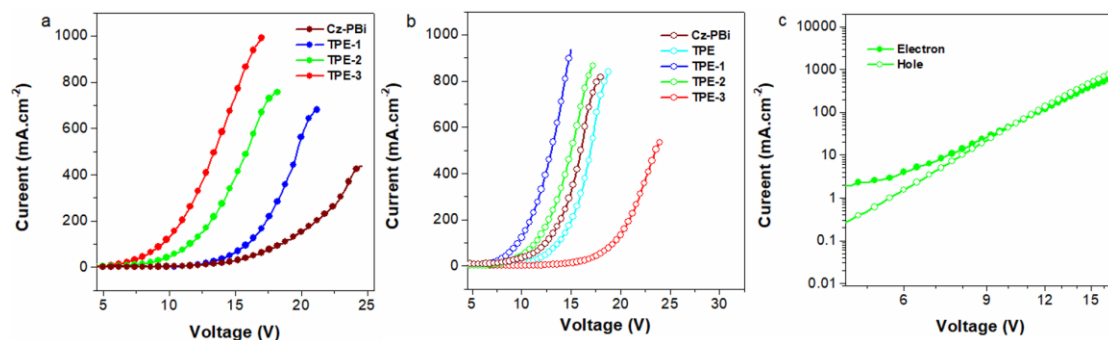

**Figure S5.** The current density-voltage characteristics of a) electron-only (linear), b) hole-only (linear) devices of the and c) the comparison within TPE-2(double logarithm)

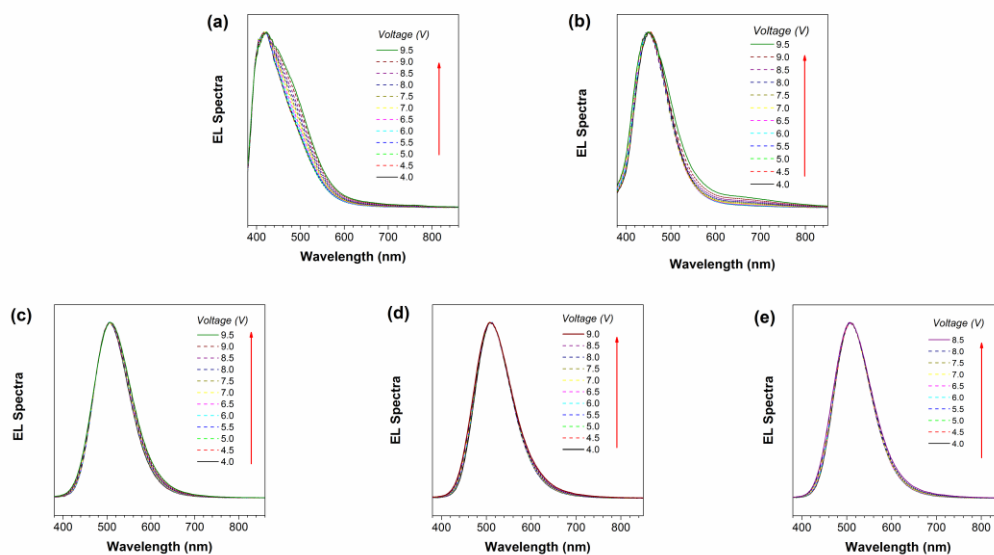

**Figure S6.** EL spectra of the nondoped OLED devices based on the emitters of (a) Cz-PBi, (b) TPE, (c) TPE-1, (d) TPE-2, and (e) TPE-3 at different working voltages.

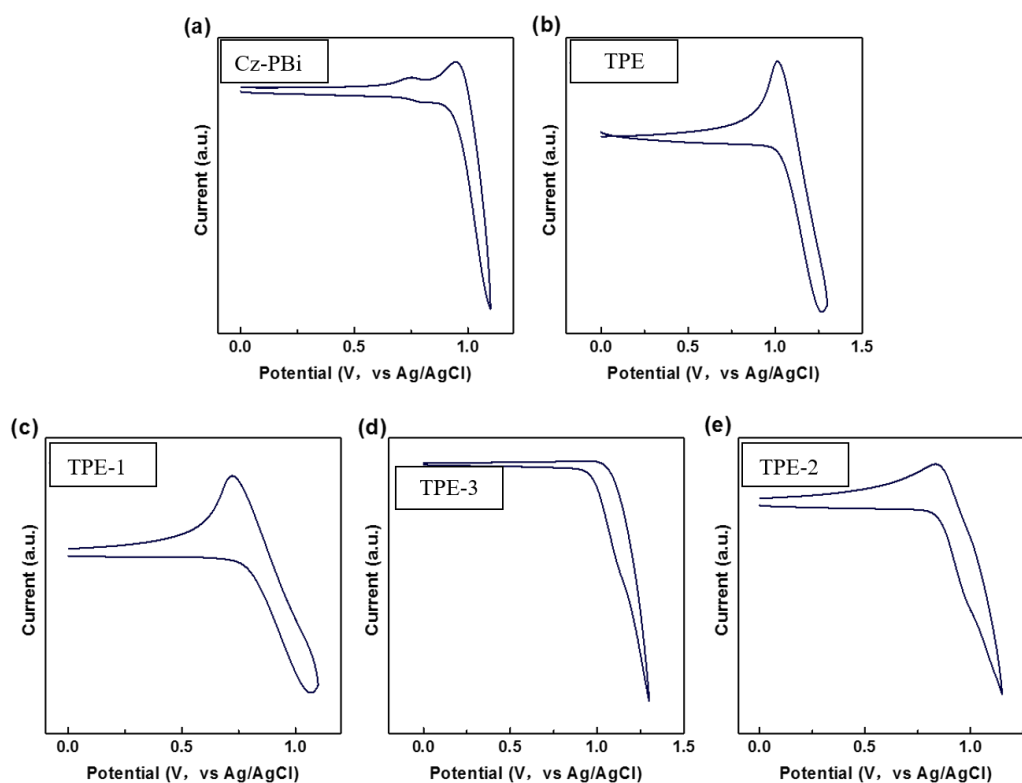

**Figure S7. Cyclicvoltammmetry characteristics of (a) Cz-PBi, (b) TPE, (c) TPE-1, (d) TPE-3, and (e) TPE-2**

## 5. OLED Device's Fabrication and Characterization

The materials to fabricate OLED devices were purchased from Jinlin Optical and Electronic Materials Co. The Indium-doped tin oxide (ITO) glass sheet (1.2 mm thick,  $\leq 15 \Omega/\text{square}$ , transmittance  $> 90\%$ ) was purchased from Nippon Sheet Glass Company, Ltd, and cleaned by a routine cleaning procedure which includes initial manual washed in aqueous detergent, and then sequentially sonication in acetone, isopropanol and ethanol for 30 minutes each. Then, the pre-cleaned ITO glass was moved into an ultraviolet chamber for UV-ozone treatment of 20 minutes. The synthesized emitting materials **TPE 1-3** were further purified through sublimation at  $220^\circ\text{C}$  under the vacuum of  $1.5 \times 10^{-3} \text{ Pa}$  in the sublimation system (CSe solar ETS-60T-S) before fabricating the OLED devices.

The organic layers were deposited consecutively on the pre-cleaned ITO glass substrates in a vacuum chamber ( $5 \times 10^{-4} \text{ Pa}$ ). The deposition rate of all the organic

materials was  $0.9\text{-}1.1\text{ \AA s}^{-1}$ , while that of the LiF was  $0.1\text{ \AA s}^{-1}$  and aluminum was  $5\text{ \AA s}^{-1}$ . The electrical characteristics of the devices were measured with a Keithley 2400 Source meter at the range of 0-15V. The electroluminescence spectra and luminance of the devices were obtained on a PR655 spectrometer in ambient conditions at room temperature.

1. Dong Y, Lam JWY, Qin A, Liu J, Li Z, Tang BZ, et al. Aggregation-induced emissions of tetraphenylethene derivatives and their utilities as chemical vapor sensors and in organic light-emitting diodes. *Applied Physics Letters*. 2007;91(1).
